# Supplementary material
Source: ML conference proceedings conference paper supplement (https://proceedings.neurips.cc/paper_files/paper/2018/hash/36f4d832825380f102846560a5104c90-Abstract.html)
Supplement: Supplementary file [file 36f4d832825380f102846560a5104c90-Supplemental.zip]

---

# Coordinate Descent with Bandit Sampling

---

Farnood Salehi<sup>1</sup>

Patrick Thiran<sup>2</sup>

L. Elisa Celis<sup>3</sup>

<sup>1,2,3</sup> School of Computer and Communication Sciences  
École Polytechnique Fédérale de Lausanne (EPFL)  
firstname.lastname@epfl.ch

## Abstract

Coordinate descent methods usually minimize a cost function by updating a random decision variable (corresponding to one coordinate) at a time. Ideally, we would update the decision variable that yields the largest decrease in the cost function. However, finding this coordinate would require checking all of them, which would effectively negate the improvement in computational tractability that coordinate descent is intended to afford. To address this, we propose a new adaptive method for selecting a coordinate. First, we find a lower bound on the amount the cost function decreases when a coordinate is updated. We then use a multi-armed bandit algorithm to learn which coordinates result in the largest lower bound by interleaving this learning with conventional coordinate descent updates except that the coordinate is selected proportionately to the expected decrease. We show that our approach improves the convergence of coordinate descent methods both theoretically and experimentally.

## 1 Introduction

Most supervised learning algorithms minimize an empirical risk cost function over a dataset. Designing fast optimization algorithms for these cost functions is crucial, especially as the size of datasets continues to increase. (Regularized) empirical risk cost functions can often be written as

$$F(\mathbf{x}) = f(A\mathbf{x}) + \sum_{i=1}^d g_i(x_i), \quad (1)$$

where  $f(\cdot) : \mathbb{R}^n \rightarrow \mathbb{R}$  is a smooth convex function,  $d$  is the number of decision variables (coordinates) on which the cost function is minimized, which are gathered in vector  $\mathbf{x} \in \mathbb{R}^d$ ,  $g_i(\cdot) : \mathbb{R} \rightarrow \mathbb{R}$  are convex functions for all  $i \in [d]$ , and  $A \in \mathbb{R}^{n \times d}$  is the data matrix. As a running example, consider Lasso: if  $\mathbf{Y} \in \mathbb{R}^n$  are the labels,  $f(A\mathbf{x}) = 1/2n\|\mathbf{Y} - A\mathbf{x}\|^2$ , where  $\|\cdot\|$  stands for the Euclidean norm, and  $g_i(x_i) = \lambda|x_i|$ . When Lasso is minimized,  $d$  is the number of features, whereas when the dual of Lasso is minimized,  $d$  is the number of datapoints.

The gradient descent method is widely used to minimize (1). However, computing the gradient of the cost function  $F(\cdot)$  can be computationally prohibitive. To bypass this problem, two approaches have been developed: (i) Stochastic Gradient Descent (SGD) selects one *datapoint* to compute an unbiased estimator for the gradient at each time step, and (ii) Coordinate Descent (CD) selects one *coordinate* to optimize over at each time step. In this paper, we focus on improving the latter technique.

When CD was first introduced, algorithms did not differentiate between coordinates; each coordinate  $i \in [d]$  was selected uniformly at random at each time step (see, e.g., [19, 20]). However, recent works (see, e.g., [10, 24, 15]) have shown that exploiting the structure of the data and sampling the

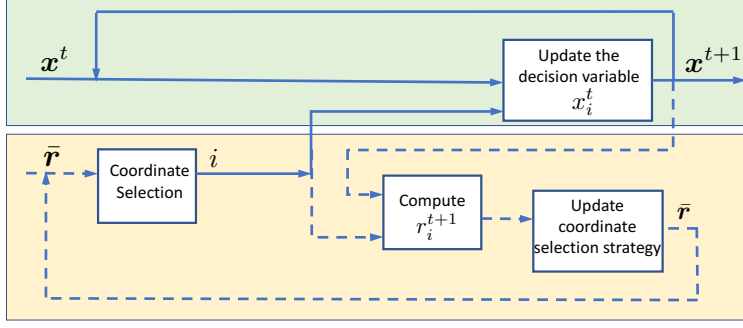

Figure 1: Our approach for coordinate descent. The top (green) part of the approach handles the updates to the decision variable  $x_i^t$  (using whichever CD update is desired; our theoretical results hold for updates in the class  $\mathcal{H}$  in Definition 4 in the supplementary materials). The bottom (yellow) part of the approach handles the selection of  $i \in [d]$  according to a coordinate selection strategy which is updated via bandit optimization (using whichever bandit algorithm is desired) from  $r_i^{t+1}$ .

coordinates from an appropriate non-uniform distribution can result in better convergence guarantees, both in theory and practice. The challenge is to find the appropriate non-uniform sampling distribution with a lightweight mechanism that maintains the computational tractability of CD.

In this work, we propose a novel adaptive non-uniform coordinate selection method that can be applied to both the primal and dual forms of a cost function. The method exploits the structure of the data to optimize the model by finding and frequently updating the most predictive decision variables. In particular, for each  $i \in [d]$  at time  $t$ , a lower bound  $r_i^t$  is derived (which we call the *marginal decrease*) on the amount by which the cost function will decrease when only the  $i^{th}$  coordinate is updated.

The marginal decrease  $r_i^t$  quantifies by how much updating the  $i^{th}$  coordinate is guaranteed to improve the model. The coordinate  $i$  with the largest  $r_i^t$  is then the one that is updated by the algorithm `max_r`, described in Section 2.3. This approach is particularly beneficial when the distribution of  $r_i^t$ s has a high variance across  $i$ ; in such cases updating different coordinates can yield very different decreases in the cost function. For example, if the distribution of  $r_i^t$ s has a high variance across  $i$ , `max_r` is up to  $d^2$  times better than uniform sampling, whereas state-of-the-art methods can be at most  $d^{3/2}$  better than uniform sampling in such cases (see Theorem 2 in Section 2.3). More precisely, in `max_r` the convergence speed is proportional to the ratio of the duality gap to the maximum coordinate-wise duality gap. `max_r` is able to outperform existing adaptive methods because it explicitly finds the coordinates that yield a large decrease of the cost function, instead of computing a distribution over coordinates based on an approximation of the marginal decreases.

However, the computation of the marginal decrease  $r_i^t$  for all  $i \in [d]$  may still be computationally prohibitive. To bypass this obstacle, we adopt in Section 2.4 a principled approach (`B_max_r`) for learning the best  $r_i^t$ s, instead of explicitly computing all of them: At each time  $t$ , we choose a single coordinate  $i$  and update it. Next, we compute the marginal decrease  $r_i^t$  of the selected coordinate  $i$  and use it as feedback to adapt our coordinate selection strategy using a bandit framework. Thus, in effect, we learn estimates of the  $r_i^t$ s and simultaneously optimize the cost function (see Figure 1). We prove that this approach can perform almost as well as `max_r`, yet decreases the number of calculations required by a factor of  $d$  (see Proposition 2).

We test this approach on several standard datasets, using different cost functions (including Lasso, logistic and ridge regression) and for both the adaptive setting (the first approach) and the bandit setting (the second approach). We observe that the bandit coordinate selection approach accelerates the convergence of a variety of CD methods (e.g., `StingyCD` [11] for Lasso in Figure 2, dual CD [18] for  $L_1$ -regularized logistic-regression in Figure 3, and dual CD [13] for ridge-regression in Figure 3). Furthermore, we observe that in most of the experiments `B_max_r` (the second approach) converges as fast as `max_r` (the first approach), while it has the same computational complexity as CD with uniform sampling (see Section 4).

## 2 Technical Contributions

### 2.1 Preliminaries

Consider the following primal-dual optimization pairs

$$\min_{\mathbf{x} \in \mathbb{R}^d} F(\mathbf{x}) = f(A\mathbf{x}) + \sum_{i=1}^d g_i(x_i), \quad \min_{\mathbf{w} \in \mathbb{R}^n} F_D(\mathbf{w}) = f^*(\mathbf{w}) + \sum_{i=1}^d g_i^*(-\mathbf{a}_i^\top \mathbf{w}), \quad (2)$$

where  $A = [\mathbf{a}_1, \dots, \mathbf{a}_d]$ ,  $\mathbf{a}_i \in \mathbb{R}^n$ , and  $f^*$  and  $g_i^*$  are the convex conjugates of  $f$  and  $g_i$ , respectively.<sup>1</sup> The goal is to find  $\bar{\mathbf{x}} := \operatorname{argmin}_{\mathbf{x} \in \mathbb{R}^d} F(\mathbf{x})$ . In rest of the paper, we will need the following notations. We denote by  $\epsilon(\mathbf{x}) = F(\mathbf{x}) - F(\bar{\mathbf{x}})$  the *sub-optimality gap* of  $F(\mathbf{x})$ , and by  $G(\mathbf{x}, \mathbf{w}) = F(\mathbf{x}) - (-F_D(\mathbf{w}))$  the *duality gap* between the primal and the dual solutions, which is an upper bound on  $\epsilon(\mathbf{x})$  for all  $\mathbf{x} \in \mathbb{R}^d$ . We further use the shorthand  $G(\mathbf{x})$  for  $G(\mathbf{x}, \mathbf{w})$  when  $\mathbf{w} = \nabla f(A\mathbf{x})$ . For  $\mathbf{w} = \nabla f(A\mathbf{x})$ , using the Fenchel-Young property  $f(A\mathbf{x}) + f^*(\mathbf{w}) = (A\mathbf{x})^\top \mathbf{w}$ ,  $G(\mathbf{x})$  can be written as  $G(\mathbf{x}) = \sum_{i=1}^d G_i(\mathbf{x})$  where  $G_i(\mathbf{x}) = (g_i^*(-\mathbf{a}_i^\top \mathbf{w}) + g_i(x_i) + x_i \mathbf{a}_i^\top \mathbf{w})$  is the  $i^{\text{th}}$  *coordinate-wise duality gap*. Finally, we denote by  $\kappa_i = \bar{u} - x_i$  the  $i^{\text{th}}$  *dual residue* where  $\bar{u} = \arg \min_{u \in \partial g_i^*(-\mathbf{a}_i^\top \mathbf{w})} |u - x_i|$  with  $\mathbf{w} = \nabla f(A\mathbf{x})$ .

### 2.2 Marginal Decreases

Our coordinate selection approach works for a class  $\mathcal{H}$  of update rules for the decision variable  $x_i$ . For the ease of exposition, we defer the formal definition of the class  $\mathcal{H}$  (Definition 4) to the supplementary materials and give here an informal but more insightful definition. The class  $\mathcal{H}$  uses the following *reference* update rule for  $x_i$ , when  $f(\cdot)$  is  $1/\beta$ -smooth and  $g_i$  is  $\mu_i$ -strongly convex:  $x_i^{t+1} = x_i^t + s_i^t \kappa_i^t$ , where

$$s_i^t = \min \left\{ 1, \frac{G_i^t + \mu_i |\kappa_i^t|^2 / 2}{|\kappa_i^t|^2 (\mu_i + \|\mathbf{a}_i\|^2 / \beta)} \right\}. \quad (3)$$

$\kappa_i^t$ , the  $i^{\text{th}}$  dual residue at time  $t$ , and  $G_i^t$ , the  $i^{\text{th}}$  coordinate-wise duality gap at time  $t$ , quantify the sub-optimality along coordinate  $i$ . Because of (3), the effect of  $s_i^t$  is to increase the step size of the update of  $x_i^t$  when  $G_i^t$  is large. The class  $\mathcal{H}$  contains also all update rules that decrease the cost function faster than the reference update rule (see two criteria (11) and (12) in Definition 4 in the supplementary materials. For example, the update rules in [18] and [11] for Lasso, the update rules in [20] for hinge-loss SVM and ridge regression, the update rule in [6] for the strongly convex functions, in addition to the reference update rule defined above, belong to this class  $\mathcal{H}$ .

We begin our analysis with a lemma that provides the marginal decrease  $r_i^t$  of updating a coordinate  $i \in [d]$  according to any update rule in the class  $\mathcal{H}$ .

**Lemma 1** *In (1), let  $f$  be  $1/\beta$ -smooth and each  $g_i$  be  $\mu_i$ -strongly convex with convexity parameter  $\mu_i \geq 0 \forall i \in [d]$ . For  $\mu_i = 0$ , we assume that  $g_i$  has a  $L$ -bounded support. After selecting the coordinate  $i \in [d]$  and updating  $x_i^t$  with an update rule in  $\mathcal{H}$ , we have the following guarantee:*

$$F(\mathbf{x}^{t+1}) \leq F(\mathbf{x}^t) - r_i^t, \quad (4)$$

where

$$r_i^t = \begin{cases} G_i^t - \frac{\|\mathbf{a}_i\|^2 |\kappa_i^t|^2}{2\beta} & \text{if } s_i^t = 1, \\ \frac{s_i^t (G_i^t + \mu_i |\kappa_i^t|^2 / 2)}{2} & \text{otherwise.} \end{cases} \quad (5)$$

In the proof of Lemma 1 in the supplementary materials, the decrease of the cost function is upper-bounded using the smoothness property of  $f(\cdot)$  and the convexity of  $g_i(\cdot)$  for any update rule in the class  $\mathcal{H}$ .

**Remark 1** *In the well-known SGD, the cost function  $F(\mathbf{x}^t)$  might increase at some iterations  $t$ . In contrast, if we use CD with an update rule in  $\mathcal{H}$ , it follows from (5) and (3) that  $r_i^t \geq 0$  for all  $t$ , and from (4) that the cost function  $F(\mathbf{x}^t)$  never increases. This property provides a strong stability guarantee, and explains (in part) the good performance observed in the experiments in Section 4.*

<sup>1</sup>Recall that the convex conjugate of a function  $h(\cdot) : \mathbb{R}^d \rightarrow \mathbb{R}$  is  $h^*(\mathbf{x}) = \sup_{\mathbf{v} \in \mathbb{R}^d} \{\mathbf{x}^\top \mathbf{v} - h(\mathbf{v})\}$ .

### 2.3 Greedy Algorithms (Full Information Setting)

In first setting, which we call full information setting, we assume that we have computed  $r_i^t$  for all  $i \in [d]$  and all  $t$  (we will relax this assumption in Section 2.4). Our first algorithm `max_r` makes then a greedy use of Lemma 1, by simply choosing at time  $t$  the coordinate  $i$  with the largest  $r_i^t$ .

**Proposition 1 (max\_r)** *Under the assumptions of Lemma 1, the optimal coordinate  $i_t$  for minimizing the right-hand side of (4) at time  $t$  is  $i_t = \arg \max_{j \in [d]} r_j^t$ .*

**Remark 2** *This rule can be seen as an extension of the Gauss-Southwell rule [13] for the class of cost functions that the gradient does not exist, which selects the coordinate whose gradient has the largest magnitude (when  $\nabla_i F(\mathbf{x})$  exists), i.e.,  $i_t = \arg \max_{i \in [d]} |\nabla_i F(\mathbf{x})|$ . Indeed, Lemma 2 in the supplementary materials shows that for the particular case of  $L_2$ -regularized cost functions  $F(\mathbf{x})$ , the Gauss-Southwell rule and `max_r` are equivalent.*

If functions  $g_i(\cdot)$  are strongly convex (i.e.,  $\mu_i > 0$ ), then `max_r` results in a linear convergence rate and matches the lower bound in [2].

**Theorem 1** *Let  $g_i$  in (1) be  $\mu_i$ -strongly convex with  $\mu_i > 0$  for all  $i \in [d]$ . Under the assumptions of Lemma 1, we have the following linear convergence guarantee:*

$$\epsilon(\mathbf{x}^t) \leq \epsilon(\mathbf{x}^0) \prod_{l=1}^t \left( 1 - \max_{i \in [d]} \frac{G_i(\mathbf{x}^l) \mu_i}{G(\mathbf{x}^l) \left( \mu_i + \frac{\|\mathbf{a}_i\|^2}{\beta} \right)} \right), \quad (6)$$

for all  $t > 0$ , where  $\epsilon(\mathbf{x}^0)$  is the sub-optimality gap at  $t = 0$ .

Now, if functions  $g_i(\cdot)$  are not necessary strongly convex (i.e.,  $\mu_i = 0$ ), `max_r` is also very effective and outperforms the state-of-the-art.

**Theorem 2** *Under the assumptions of Lemma 1, let  $\mu_i \geq 0$  for all  $i \in [d]$ . Then,*

$$\epsilon(\mathbf{x}^t) \leq \frac{8L^2\eta^2/\beta}{2d + t - t_0} \quad (7)$$

for all  $t \geq t_0$ , where  $t_0 = \max\{1, 2d \log \frac{d\beta\epsilon(\mathbf{x}^0)}{4L^2\eta^2}\}$ ,  $\epsilon(\mathbf{x}^0)$  is the sub-optimality gap at  $t = 0$  and  $\eta = O(d)$  is an upper bound on  $\min_{i \in [d]} G(\mathbf{x}^t) \|\mathbf{a}_i\|/G_i(\mathbf{x}^t)$  for all iterations  $l \in [t]$ .

To make the convergence bounds (6) and (7) easier to understand, assume that  $\mu_i = \mu_1$  and that the data is normalized, so that  $\|\mathbf{a}_i\| = 1$  for all  $i \in [d]$ . First, by letting  $\eta = O(d)$  be an upper bound on  $\min_{i \in [d]} G(\mathbf{x}^t)/G_i(\mathbf{x}^t)$  for all iterations  $l \in [t]$ , Theorem 1 results in a linear convergence rate, i.e.,  $\epsilon(\mathbf{x}^t) = O(\exp(-c_1 t/\eta))$  for some constant  $c_1 > 0$  that depends on  $\mu_1$  and  $\beta$ , whereas Theorem 2 provides a sublinear convergence guarantee, i.e.,  $\epsilon(\mathbf{x}^t) = O(\eta^2/t)$ .

Second, note that in both convergence guarantees, we would like to have a small  $\eta$ . The ratio  $\eta$  can be as large as  $d$ , when the different coordinate-wise gaps  $G_i(\mathbf{x}^t)$  are equal. In this case, non-uniform sampling does not bring any advantage over uniform sampling, as expected. In contrast, if for instance  $c \cdot G(\mathbf{x}^t) \leq \max_{i \in [d]} G_i(\mathbf{x}^t)$  for some constant  $1/d \leq c \leq 1$ , then choosing the coordinate with the largest  $r_i^t$  results in a decrease in the cost function, that is  $1 \leq c \cdot d$  times larger compared to uniform sampling. Theorems 1 and 2 are proven in the supplementary materials.

Finally, let us compare the bound of `max_r` given in Theorem 2 with the state-of-the-art bounds of `ada_gap` in Theorem 3.7 of [15] and of CD algorithm in Theorem 2 of [8]. For the sake of simplicity, assume that  $\|\mathbf{a}_i\| = 1$  for all  $i \in [d]$ . When  $c \cdot G(\mathbf{x}^t) \leq \max_{i \in [d]} G_i(\mathbf{x}^t)$  and some constant  $1/d \leq c \leq 1$ , the convergence guarantee for `ada_gap` is  $\mathbb{E}[\epsilon(\mathbf{x}^t)] = O(\sqrt{d}L^2/\beta(c^2+1/d)^{3/2}(2d+t))$  and the convergence guarantee of the CD algorithm in [8] is  $\mathbb{E}[\epsilon(\mathbf{x}^t)] = O(dL^2/\beta c(2d+t))$ , which are much tighter than the convergence guarantee of CD with uniform sampling  $\mathbb{E}[\epsilon(\mathbf{x}^t)] = O(d^2L^2/\beta(2d+t))$ . In contrast, the convergence guarantee of `max_r` is  $\epsilon(\mathbf{x}^t) = O(L^2/\beta c^2(2d+t))$ , which is  $\sqrt{d}/c$  times better than `ada_gap`,  $dc$  times better than the CD algorithm in [8] and  $c^2d^2$  times better than uniform sampling for the same constant  $c \geq 1/d$ .

**Remark 3** *There is no randomness in the selection rule used in `max_r` (beyond tie breaking), hence the convergence results given in Theorems 1 and 2 a.s. hold for all  $t$ .*

## 2.4 Bandit Algorithms (Partial Information Setting)

State-of-the-art algorithms and `max_r` require knowing a sub-optimality metric (e.g.,  $G_i^t$  in [15, 8], the norm of gradient  $\nabla_i F(\mathbf{x}^t)$  in [13], the marginal decreases  $r_i^t$  in this work) for all coordinates  $i \in [d]$ , which can be computationally expensive if the number of coordinates  $d$  is large. To overcome this problem, we use a novel approach inspired by the bandit framework that *learns* the best coordinates over time from the partial information it receives during the training.

**Multi-armed Bandit:** In a multi-armed bandit (MAB) problem, there are  $d$  possible arms (which are here the coordinates) that a bandit algorithm can choose from for a reward ( $r_i^t$  in this work) at time  $t$ . The goal of the MAB is to maximize the cumulative rewards that it receives over  $T$  rounds (i.e.,  $\sum_{i=1}^T r_{i_t}^t$ , where  $i_t$  is the arm (coordinate) selected at time  $t$ ). After each round, the MAB only observes the reward of the selected arm  $i_t$ , and hence has only access to *partial information*, which it then uses to refine its arm (coordinate) selection strategy for the next round.

---

### Algorithm 1 B\_max\_r

---

```

input:  $\mathbf{x}^0, \varepsilon$  and  $E$ 
initialize: set  $\bar{r}_i^0 = r_i^0$  for all  $i \in [d]$ 
for  $t = 1$  to  $T$  do
  if  $t \bmod E == 0$  then
    set  $\bar{r}_i^t = r_i^t$  for all  $i \in [d]$ 
  end if
  Generate  $K \sim \text{Bern}(\varepsilon)$ 
  if  $K == 1$  then
    Select  $i_t \in [d]$  uniformly at random
  else
    Select  $i_t = \arg \max_{i \in [d]} \bar{r}_i^t$ 
  end if
  Update  $x_{i_t}^t$  by an update rule in  $\mathcal{H}$ 
  Set  $\bar{r}_{i_t}^{t+1} = r_{i_t}^{t+1}$  and  $\bar{r}_i^{t+1} = \bar{r}_i^t$  for all  $i \neq i_t$ 
end for

```

---

In our second algorithm `B_max_r`, the marginal decreases  $r_i^t$  computed for all  $i \in [d]$  at each round  $t$  by `max_r` are replaced by estimates  $\bar{r}_i$  computed by an MAB as follows. First, time is divided into bins of size  $E$ . At the beginning of a bin  $t_e$ , the marginal decreases  $r_i^{t_e}$  of all coordinates  $i \in [d]$  are computed, and the estimates are set to these values ( $\bar{r}_i^t = r_i^{t_e}$  for all  $i \in [d]$ ). At each iteration  $t_e \leq t \leq t_e + E$  within that bin, with probability  $\varepsilon$  a coordinate  $i_t \in [d]$  is selected uniformly at random, and otherwise (with probability  $(1 - \varepsilon)$ ) the coordinate with the largest  $\bar{r}_i^t$  is selected. Coordinate  $i_t$  is next updated, as well as the estimate of the marginal decrease  $\bar{r}_{i_t}^{t+1} = r_{i_t}^{t+1}$ , whereas the other estimates  $\bar{r}_j^{t+1}$  remain unchanged for  $j \neq i_t$ . The algorithm can be seen as a modified version of  $\varepsilon$ -greedy (see [3]) that is devel-

oped for the setting where the reward of arms follow a fixed probability distribution,  $\varepsilon$ -greedy uses the empirical mean of the observed rewards as an estimate of the rewards. In contrast, in our setting, the rewards do not follow such a fixed probability distribution and the most recently observed reward is the best estimate of the reward that we could have. In `B_max_r`, we choose  $E$  not too large and  $\varepsilon$  large enough such that every arm (coordinate) is sampled often enough to maintain an accurate estimate of the rewards  $r_i^t$  (we use  $E = O(d)$  and  $\varepsilon = 1/2$  in the experiments of Section 4).

The next proposition shows the effect of the estimation error on the convergence rate.

**Proposition 2** *Consider the same assumptions as Lemma 1 and Theorem 2. For simplicity, let  $\|\mathbf{a}_i\| = \|\mathbf{a}_1\|$  for all  $i \in [d]$  and  $\epsilon(\mathbf{x}^0) \leq \sqrt{2\alpha L^2 \|\mathbf{a}_1\|^2 / \beta (\varepsilon/d + 1 - \varepsilon/c)} = O(d)$ .<sup>2</sup> Let  $j_\star^t = \arg \max_{i \in [d]} \bar{r}_i^t$ . If  $\max_{i \in [d]} r_i^t / r_{j_\star^t}^t \leq c(E, \varepsilon)$  for some finite constant  $c = c(E, \varepsilon)$ , then by using `B_max_r` (with bin size  $E$  and exploration parameter  $\varepsilon$ ) we have*

$$\mathbb{E} [\epsilon(\mathbf{x}^t)] \leq \frac{\alpha}{2 + t - t_0}, \text{ where } \alpha = \frac{8L^2 \|\mathbf{a}_1\|^2}{\beta (\varepsilon/d^2 + (1 - \varepsilon)/\eta^2 c)}, \quad (8)$$

for all  $t \geq t_0 = \max \{1, 4\epsilon(\mathbf{x}^0)/\alpha \log(2\epsilon(\mathbf{x}^0)/\alpha)\} = O(d)$  and where  $\eta$  is an upper bound on  $\min_{i \in [d]} G(\mathbf{x}^t)/G_i(\mathbf{x}^t)$  for iterations  $l \in [t]$ .

What is the effect of  $c(E, \varepsilon)$ ? In Proposition 2,  $c = c(E, \varepsilon)$  upper bounds the estimation error of the marginal decreases  $r_i^t$ . To make the effect of  $c(E, \varepsilon)$  on the convergence bound (8) easier to

<sup>2</sup>These assumptions are not necessary but they make the analysis simpler. For example, even if  $\epsilon(\mathbf{x}^0)$  does not satisfy the required condition, we can scale down  $F(\mathbf{x})$  by  $m$  so that  $F(\mathbf{x})/m$  is minimized. The new sub-optimality gap becomes  $\epsilon(\mathbf{x}^0)/m$ , and for a sufficiently large  $m$  the initial condition is satisfied.

Table 1: The shaded rows correspond to the algorithms introduced in this paper.  $\bar{z}$  denotes the number of non-zero entries of the data matrix  $A$ . The numbers below the column dataset/cost are the clock time (in seconds) needed for the algorithms to reach a sub-optimality gap of  $\epsilon(\mathbf{x}^t) = \exp(-5)$ .

| method        | computational cost<br>(per epoch) | dataset/cost |             |                |
|---------------|-----------------------------------|--------------|-------------|----------------|
|               |                                   | aloi/Lasso   | a9a/log reg | usps/ridge reg |
| uniform       | $O(\bar{z})$                      | 27.8         | 11.8        | 1              |
| ada_gap       | $O(d \cdot \bar{z})$              | 52.8         | 42.4        | 88             |
| max_r         | $O(d \cdot \bar{z})$              | 6.2          | 4.5         | 9.5            |
| gap_per_epoch | $O(\bar{z} + d \log d)$           | 75           | 11.1        | 300            |
| Approx        | $O(\bar{z} + d \log d)$           | 16.3         | 2.3         | -              |
| NUACDM        | $O(\bar{z} + d \log d)$           | -            | -           | 6              |
| B_max_r       | $O(\bar{z} + d \log d)$           | 11           | 1.9         | 1              |

understand, let  $\varepsilon = 1/2$ , then  $\alpha \sim 1/(1/d^2 + 1/\eta^2 c)$ . We can see from the convergence bound (8) and the value of  $\alpha$  that if  $c$  is large, the convergence rate is proportional to  $d^2$  similarly to uniform sampling (i.e.,  $\epsilon(\mathbf{x}^t) \in O(d^2/t)$ ). Otherwise, if  $c$  is small, the convergence rate is similar to max\_r ( $\epsilon(\mathbf{x}^t) \in O(\eta^2/t)$ , see Theorem 2).

*How to control  $c = c(E, \varepsilon)$ ?* We can control the value of  $c$  by varying the bin size  $E$ . Doing so, there is a trade-off between the value of  $c$  and the average computational cost of an iteration. On the one hand, if we set the bin size to  $E = 1$  (i.e., full information setting), then  $c = 1$  and B\_max\_r boils down to max\_r, while the average computational cost of an iteration is  $O(nd)$ . On the other hand, if  $E > 1$  (i.e., partial information setting), then  $c \geq 1$ , while the average computational complexity of an iteration is  $O(nd/E)$ . In our experiments, we find that by setting  $d/2 \leq E \leq d$ , B\_max\_r converges faster than uniform sampling (and other state-of-the-art methods) while the average computational cost of an iteration is  $O(n + \log d)$ , similarly to the computational cost of an iteration of CD with uniform sampling ( $O(n)$ ), see Figures 2 and 3. We also find that any exploration parameter  $\varepsilon \in [0.2, 0.7]$  in B\_max\_r works reasonably well. The proof of Proposition 2 is similar to the proof of Theorem 2 and is given in the supplementary materials.

### 3 Related Work

Non-uniform coordinate selection has been proposed first for constant (non-adaptive) probability distributions  $p$  over  $[d]$ . In [24],  $p_i$  is proportional to the Lipschitz constant of  $g_i^*$ . Similar distributions are used in [1, 23] for strongly convex  $f$  in (1).

Time varying (adaptive) distributions, such as  $p_i^t = |\kappa_i^t| / (\sum_{j=1}^d |\kappa_j^t|)$  [6], and  $p_i^t = G_i(\mathbf{x}^t) / G(\mathbf{x}^t)$  [15, 14], have also been considered. In all these cases, the full information setting is used, which requires the computation of the distribution  $p^t$  ( $\Omega(nd)$  calculations) at each step. To bypass this problem, heuristics are often used; e.g.,  $p^t$  is calculated once at the beginning of an epoch of length  $E$  and is left unchanged throughout the remainder of that epoch. This heuristic approach does not work well in a scenario where  $G_i(\mathbf{x}^t)$  varies significantly. In [8] a similar idea to max\_r is used with  $r_i$  replaced by  $G_i$ , but only in the full information setting. Because of the update rule used in [8], the convergence rate is  $O(d \cdot \max G_i(\mathbf{x}^t) / G(\mathbf{x}^t))$  times slower than Theorem 2 (see also the comparison at the end of Section 2.3). The Gauss-Southwell rule (GS) is another coordinate selection strategy for smooth cost functions [21] and its convergence is studied in [13] and [22]. GS selects the coordinate to update as the one that maximizes  $|\nabla_i F(\mathbf{x}^t)|$  at time  $t$ . max\_r can be seen as an extension of GS to a broader class of cost functions (see Lemma 2 in the supplementary materials). Furthermore, when only sub-gradients are defined for  $g_i(\cdot)$ , GS needs to solve a proximal problem. To address the computational tractability of GS, in [22], lower and upper bounds on the gradients are computed (instead of computing the gradient itself) and used for selecting the coordinates, but these lower and upper bounds might be loose and/or difficult to find. For example, without a heavy pre-processing of the data, ASCD in [22] converges with the same rate as uniform sampling when the data is normalized and  $f(A\mathbf{x}) = \|A\mathbf{x} - \mathbf{Y}\|^2$ .

In contrast, our principled approach leverages a bandit algorithm to learn a good estimate of  $r_i^t$ ; this allows for theoretical guarantees and outperforms the state-of-the-art methods, as we will see in Section 4. Furthermore, our approach does not require the cost function to be strongly convex (contrary to e.g., [6, 13])

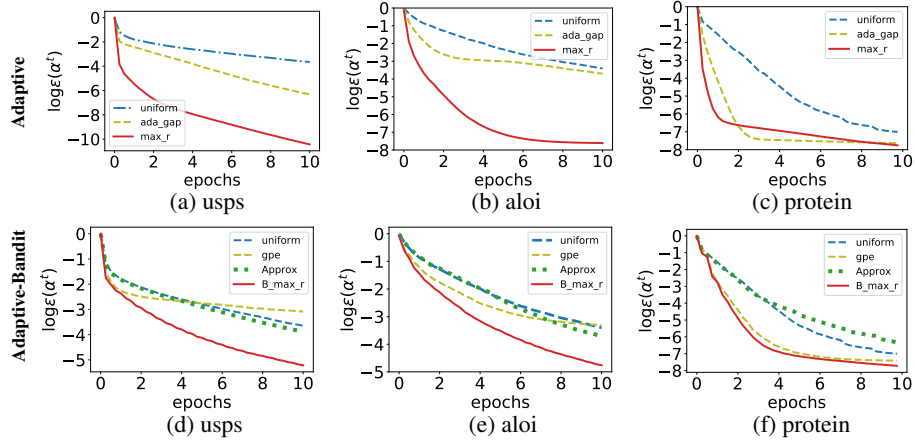

Figure 2: CD for regression using Lasso (i.e., a non-smooth cost function). Y-axis is the log of sub-optimality gap and x-axis is the number of epochs. The algorithms presented in this paper ( $\text{max\_r}$ ,  $\text{B\_max\_r}$ ) outperform the state-of-the-art across the board.

Bandit approaches have very recently been used to accelerate various stochastic optimization algorithms; among these works [12, 17, 16, 4] focus on improving the convergence of SGD by reducing the variance of the estimator for the gradient. A bandit approach is also used in [12] to sample for CD. However, instead of using the bandit to minimize the cost function directly as in  $\text{B\_max\_r}$ , it is used to minimize the variance of the estimated gradient. This results in a  $O(1/\sqrt{t})$  convergence, whereas the approach in our paper attains an  $O(1/t)$  rate of convergence. In [16] bandits are used to find the coordinate  $i$  whose gradient has the largest magnitude (similar to GS). At each round  $t$  a stochastic bandit problem is solved from scratch, ignoring all past information prior to  $t$ , which, depending on the number of datapoints, might require many iterations. In contrast, our method incorporates past information and needs only one sample per iteration.

## 4 Empirical Simulations

We compare the algorithms from this paper with the state-of-the-art approaches, in two ways. First, we compare the algorithm ( $\text{max\_r}$ ) for full information setting as in Section 2.3 against other state-of-the-art methods that similarly use  $O(d \cdot \bar{z})$  computations per epoch of size  $d$ , where  $\bar{z}$  denotes the number of non-zero elements of  $A$ . Next, we compare the algorithm for partial information setting as in Section 2.4 ( $\text{B\_max\_r}$ ) against other methods with appropriate heuristic modifications that also allow them to use  $O(\bar{z})$  computations per epoch. The datasets we use are found in [5]; we consider usps, aloi and protein for regression, and w8a and a9a for binary classification (see Table 2 in the supplementary materials for statistics about these datasets).

Various cost functions are considered for the experiments, including a strongly convex cost function (ridge regression) and non-smooth cost functions (Lasso and  $L_1$ -regularized logistic regression). These cost functions are optimized using different algorithms, which minimize either the primal or the dual cost function. The convergence time is the metric that we use to evaluate different algorithms.

### 4.1 Experimental Setup

Benchmarks for Adaptive Algorithm ( $\text{max\_r}$ ):

- **uniform** [18]: Sample a coordinate  $i \in [n]$  uniformly at random.<sup>3</sup>
- **ada\_gap** [15]: Sample a coordinate  $i \in [n]$  with probability  $G_i(\mathbf{x}^t)/G(\mathbf{x}^t)$ .

Benchmarks for Adaptive-Bandit Algorithm ( $\text{B\_max\_r}$ ): For comparison, in addition to the uniform sampling, we consider the coordinate selection method that has the best performance empirically in [15] and two accelerated CD methods NUACDM in [1] and Approx in [9].

- **gpe** [15]: This algorithm is a heuristic version of  $\text{ada\_gap}$ , where the sampling probability  $p_i^t = G_i(\mathbf{x}^t)/G(\mathbf{x}^t)$  for  $i \in [d]$  is re-computed once at the beginning of each bin of length  $E$ .

<sup>3</sup> If  $\|\mathbf{a}_i\| = \|\mathbf{a}_j\| \forall i, j \in [n]$ , importance sampling method in [24] is equivalent to uniform in Lasso and logistic regression.

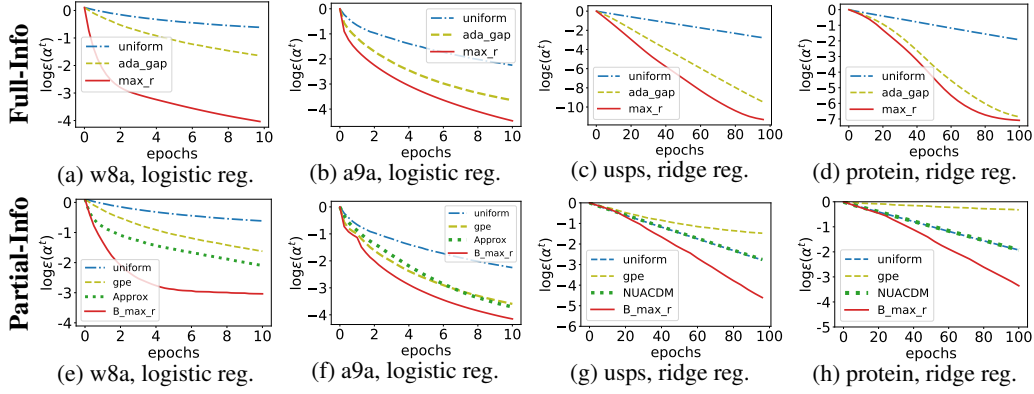

Figure 3: CD for binary Classification using  $L_1$ -regularized logistic regression and CD for regression using Lasso. The algorithms presented in this paper (max\_r and B\_max\_r) outperform the state-of-the-art across the board.

- **NUACDM** [1]: Sample a coordinate  $i \in [d]$  with probability proportional to the square root of smoothness of the cost function along the  $i^{th}$  coordinate, then use an unbiased estimator for the gradient to update the decision variables.
- **Approx** [9]: Sample a coordinate  $i \in [d]$  uniformly at random, then use an unbiased estimator for the gradient to update the decision variables.

NUACDM is the state-of-the-art accelerated CD method (see Figures 2 and 3 in [1]) for smooth cost functions. Approx is an accelerated CD method proposed for cost functions with non-smooth  $g_i(\cdot)$  in (1). We implemented Approx for such cost functions in Lasso and  $L_1$ -regularized logistic regression. We also implemented Approx for ridge-regression but NUACDM converged faster in our setting, whereas for the smoothen version of Lasso but Approx converged faster than NUACDM in our setting. The origin of the computational cost is two-fold: Sampling a coordinate  $i$  and updating it. The average computational cost of the algorithms for  $E = d/2$  is depicted in Table 1. Next, we explain the setups and update rules used in the experiments.

For Lasso  $F(\mathbf{x}) = 1/2n\|\mathbf{Y} - A\mathbf{x}\|^2 + \sum_{i=1}^n \lambda|x_i|$ . We consider the stingyCD update proposed in [11]:  $x_i^{t+1} = \arg \min_z [f(A\mathbf{x}^t + (z - x_i^t)\mathbf{a}_i)] + g_i(x_i)$ . In Lasso, the  $g_i$ s are not strongly convex ( $\mu_i = 0$ ). Therefore, for computing the dual residue, the Lipschitzing technique in [7] is used, i.e.,  $g_i(\cdot)$  is assumed to have bounded support of size  $B = F(\mathbf{x}^0)/\lambda$  and  $g_i^*(u_i) = B \max\{|u_i| - \lambda, 0\}$ .

For logistic regression  $F(\mathbf{x}) = 1/n \sum_{i=1}^n \log(1 + \exp(-y_i \cdot \mathbf{x}^\top \mathbf{a}_i)) + \sum_{i=1}^n \lambda|x_i|$ . We consider the update rule proposed in [18]:  $x_i^{t+1} = s_{4\lambda}(x_i^t - 4\partial f(A\mathbf{x}^t)/\partial x_i)$ , where  $s_\lambda(q) = \text{sign}(q) \max\{|q| - \lambda, 0\}$ .

For ridge regression  $F(\mathbf{x}) = 1/n\|\mathbf{Y} - A\mathbf{x}\|^2 + \lambda/2\|\mathbf{x}\|^2$  and it is strongly convex. We consider the update proposed for the dual of ridge regression in [20], hence B\_max\_r and other adaptive methods select one of the dual decision variables to update.

In all experiments,  $\lambda$ s are chosen such that the test and train errors are comparable, and all update rules belong to  $\mathcal{H}$ . In addition, in all experiments,  $E = d/2$  in B\_max\_r and gap\_per\_epoch. Recall that when minimizing the primal,  $d$  is the number of features and when minimizing the dual,  $d$  is the number of datapoints.

## 4.2 Empirical Results

Figure 2 shows the result for Lasso. Among the adaptive algorithms, max\_r outperforms the state-of-the-art (see Figures 2a, 2b and 2c). Among the adaptive-bandit algorithms, B\_max\_r outperforms the benchmarks (see Figures 2d, 2e and 2f). We also see that B\_max\_r converges slower than max\_r for the same number of iterations, but we note that an iteration of B\_max\_r is  $O(d)$  times cheaper than max\_r. For logistic regression, see Figures 3a, 3b, 3e and 3f. Again, those algorithms outperform the state-of-the-art. We also see that B\_max\_r converges with the same rate as max\_r. We see that the accelerated CD method Approx converges faster than uniform sampling and gap\_per\_epoch, but using B\_max\_r improves the convergence rate and reaches a lower sub-optimality gap  $\epsilon$  with the same number of iterations. For ridge regression, we see in Figures 3c, 3d that max\_r converges faster



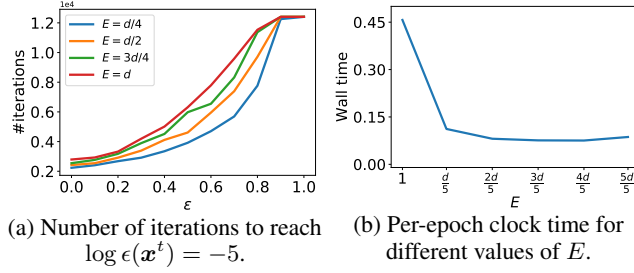

Figure 4: Analysis of the running time of B\_max\_r for different values of  $\varepsilon$  and  $E$ . A smaller  $E$  results in fewer iterations, and results in larger clock time per epoch (an epoch is  $d$  iterations of CD).

than the state-of-the-art ada-gap. We also see in Figures 3g, 3h that B\_max\_r converges faster than other algorithms. gap\_per\_epoch performs poorly because it is unable to adapt to the variability of the coordinate-wise duality gaps  $G_i$  that vary a lot from one iteration to the next. In contrast, this variation slows down the convergence of B\_max\_r compared to max\_r, but B\_max\_r is still able to cope with this change by exploring and updating the estimations of the marginal decreases. In the experiments we report the sub-optimality gap as a function of the number of iterations, but the results are also favourable when we report them as a function of actual time. To clarify, we compare the clock time needed by each algorithm to reach a sub-optimality gap  $\epsilon(\mathbf{x}^t) = \exp(-5)$  in Table 1.<sup>4</sup>

Next, we study the choice of parameters  $\varepsilon$  and  $E$  in Algorithm 1. As explained in Section 2.4 the choice of these two parameters affect  $c$  in Proposition 2, hence the convergence rate. To test the effect of  $\varepsilon$  and  $E$  on the convergence rate, we choose a9a dataset and perform a binary classification on it by using the logistic regression cost function. Figure 4a depicts the number of iterations required to reach the log-suboptimality gap  $\log \epsilon$  of  $-5$ . In the top-right corner,  $\varepsilon = 1$  and B\_max\_r becomes CD with uniform sampling (for any value of  $E$ ). As expected, for any  $\varepsilon$ , the smaller  $E$ , the smaller the number of iterations to reach the log-suboptimality gap of  $-5$ . This means that  $c(\varepsilon, E)$  is a decreasing function of  $E$ . Also, we see that as  $\varepsilon$  increases, the convergence becomes slower. That implies that for this dataset and cost function  $c(\varepsilon, E)$  is close to 1 for all  $\varepsilon$  hence there is no need for exploration and a smaller value for  $\varepsilon$  can be chosen. Figure 4b depicts the per epoch clock time for  $\varepsilon = 0.5$  and different values of  $E$ . Note that the clock time is not a function of  $\varepsilon$ . As expected, a smaller bin size  $E$  results in a larger clock time, because we need to compute the marginal decreases for all coordinates more often. After  $E = 2d/5$  we see that clock time does not decrease much, this can be explained by the fact that for large enough  $E$  computing the gradient takes more clock time than computing the marginal decreases.

## 5 Conclusion

In this work, we propose a new approach to select the coordinates to update in CD methods. We derive a lower bound on the decrease of the cost function in Lemma 1, i.e., the marginal decrease, when a coordinate is updated, for a large class of update methods  $\mathcal{H}$ . We use the marginal decreases to quantify how much updating a coordinate improves the model. Next, we use a bandit algorithm to *learn* which coordinates decrease the cost function significantly throughout the course of the optimization algorithm by using the marginal decreases as feedback (see Figure 1). We show that the approach converges faster than state-of-the-art approaches both theoretically and empirically. We emphasize that our coordinate selection approach is quite general and works for a large class of update rules  $\mathcal{H}$ , which includes Lasso, SVM, ridge and logistic regression, and a large class of bandit algorithms that select the coordinate to update.

The bandit algorithm B\_max\_r uses only the marginal decrease of the selected coordinate to update the estimations of the marginal decreases. An important open question is to understand the effect of having additional budget to choose multiple coordinates at each time  $t$ . The challenge lies in designing appropriate algorithms to invest this budget to update the coordinate selection strategy such that B\_max\_r performance becomes even closer to max\_r.

<sup>4</sup>In our numerical experiments, all algorithms are optimized as much as possible by avoiding any unnecessary computations, by using efficient data structures for sampling, by reusing the computed values from past iterations and (if possible) by writing the computations in efficient matrix form.

## References

- [1] Z Allen-Zhu, Z Qu, P Richtárik, and Y Yuan. Even faster accelerated coordinate descent using non-uniform sampling. In *International Conference on Machine Learning*, pages 1110–1119, 2016.
- [2] Y Arjevani and O Shamir. Dimension-free iteration complexity of finite sum optimization problems. In *Advances in Neural Information Processing Systems*, pages 3540–3548, 2016.
- [3] P Auer, N Cesa-Bianchi, Y Freund, and R Schapire. The nonstochastic multiarmed bandit problem. *SIAM journal on computing*, 32(1):48–77, 2002.
- [4] Z Borsos, A Krause, and K Levy. Online variance reduction for stochastic optimization. In *International Conference on Learning Theory*, 2018.
- [5] C Chang and C Lin. Libsvm: a library for support vector machines. *ACM Transactions on Intelligent Systems and Technology*, 2(3):27, 2011.
- [6] D Csiba, Z Qu, and P Richtárik. Stochastic dual coordinate ascent with adaptive probabilities. In *International Conference on Machine Learning*, 2015.
- [7] C Dünnér, S Forte, M Takáč, and M Jaggi. Primal-dual rates and certificates. In *International Conference on Machine Learning*, 2016.
- [8] C Dünnér, T Parnell, and M Jaggi. Efficient use of limited-memory accelerators for linear learning on heterogeneous systems. In *Advances in Neural Information Processing Systems*, pages 4261–4270, 2017.
- [9] O Fercoq and P Richtárik. Accelerated, parallel, and proximal coordinate descent. *SIAM Journal on Optimization*, 25(4):1997–2023, 2015.
- [10] T Glasmachers and U Dogan. Accelerated coordinate descent with adaptive coordinate frequencies. In *Asian Conference on Machine Learning*, pages 72–86, 2013.
- [11] T Johnson and C Guestrin. Stingycd: Safely avoiding wasteful updates in coordinate descent. In *International Conference on Machine Learning*, pages 1752–1760, 2017.
- [12] H Namkoong, A Sinha, S Yadlowsky, and J Duchi. Adaptive sampling probabilities for non-smooth optimization. In *International Conference on Machine Learning*, 2017.
- [13] J Nutini, M Schmidt, I Laradji, M Friedlander, and H Koepke. Coordinate descent converges faster with the gauss-southwell rule than random selection. In *International Conference on Machine Learning*, pages 1632–1641, 2015.
- [14] A Osokin, J Alayrac, I Lukasewitz, P Dokania, and S Lacoste-Julien. Minding the gaps for block frank-wolfe optimization of structured svms. In *International Conference on Machine Learning*, 2016.
- [15] D Perekhrenko, V Cevher, and M Jaggi. Faster coordinate descent via adaptive importance sampling. In *International Conference on Artificial Intelligence and Statistics*, 2017.
- [16] A Rakotomamonjy, S Koço, and L Ralaivola. Greedy methods, randomization approaches, and multiarm bandit algorithms for efficient sparsity-constrained optimization. *IEEE transactions on neural networks and learning systems*, 28(11):2789–2802, 2017.
- [17] F Salehi, L.E Celis, and P Thiran. Stochastic optimization with bandit sampling. *arXiv preprint arXiv:1708.02544v2*, 2017.
- [18] S Shalev-Shwartz and A Tewari. Stochastic methods for  $l_1$ -regularized loss minimization. *Journal of Machine Learning Research*, 12(Jun):1865–1892, 2011.
- [19] S Shalev-Shwartz and T Zhang. Accelerated mini-batch stochastic dual coordinate ascent. In *Advances in Neural Information Processing Systems*, pages 378–385, 2013a.

- [20] S Shalev-Shwartz and T Zhang. Stochastic dual coordinate ascent methods for regularized loss minimization. *Journal of Machine Learning Research*, 14(Feb):567–599, 2013b.
- [21] H Shi, S Tu, Y Xu, and W Yin. A primer on coordinate descent algorithms. *arXiv preprint arXiv:1610.00040*, 2016.
- [22] S Stich, At Raj, and M Jaggi. Approximate steepest coordinate descent. In *International Conference on Machine Learning*, 2017.
- [23] A Zhang and Q Gu. Accelerated stochastic block coordinate descent with optimal sampling. In *International Conference on Knowledge Discovery and Data Mining*, pages 2035–2044. ACM, 2016.
- [24] P Zhao and T Zhang. Stochastic optimization with importance sampling for regularized loss minimization. In *International Conference on Machine Learning*, 2015.

## Appendix

### A Basic Definitions

For completeness, in this section we recall a variety of standard definitions.

#### A.1 Basic Definitions

**Definition 1 ( $1/\beta$ -smooth)** A function  $f(\cdot) : \mathbb{R}^n \rightarrow \mathbb{R}$  is  $1/\beta$ -smooth if for any  $\mathbf{x} \in \mathbb{R}^n$  and  $\mathbf{y} \in \mathbb{R}^n$

$$f(\mathbf{y}) \leq f(\mathbf{x}) + \nabla f(\mathbf{x})^\top (\mathbf{y} - \mathbf{x}) + \frac{1}{2\beta} \|\mathbf{x} - \mathbf{y}\|^2.$$

**Definition 2 ( $\mu$ -strongly convex)** A function  $f(\cdot) : \mathbb{R}^n \rightarrow \mathbb{R}$  is  $\mu$ -strongly convex if for any  $\mathbf{x} \in \mathbb{R}^n$  and  $\mathbf{y} \in \mathbb{R}^n$

$$f(\mathbf{y}) \geq f(\mathbf{x}) + \nabla f(\mathbf{x})^\top (\mathbf{y} - \mathbf{x}) + \frac{\mu}{2} \|\mathbf{x} - \mathbf{y}\|^2.$$

**Definition 3 ( $L$ -bounded support)** A function  $f(\cdot) : \mathbb{R}^n \rightarrow \mathbb{R}$  has  $L$ -bounded support if there exists a euclidean ball with radius  $L$  such

$$f(\mathbf{x}) < \infty \Rightarrow \|\mathbf{x}\| \leq L.$$

#### A.2 The Class of Update Rules

**Definition 4 ( $\mathcal{H}$ )** In (1), let  $f(\cdot)$  be  $1/\beta$ -smooth and each  $g_i(\cdot)$  be  $\mu_i$ -strongly convex with convexity parameter  $\mu_i \geq 0 \forall i \in [d]$ . For  $\mu_i = 0$ , we assume that  $g_i$  has a  $L_i$ -bounded support. Let  $\hat{h} : \mathbb{R}^n \times [n] \rightarrow \mathbb{R}^n$  be the update rule, i.e.,  $\mathbf{x}^{t+1} = \hat{h}(\mathbf{x}^t, i)$ , for the decision variables  $\mathbf{x}^t$  whose  $j^{\text{th}}$  entry is

$$\hat{h}_j(\mathbf{x}, i) = \begin{cases} x_j + s_j \kappa_j & \text{if } j = i, \\ x_j & \text{if } j \neq i, \end{cases} \quad (9)$$

where

$$s_i = \min \left\{ 1, \frac{G_i(\mathbf{x}) + \mu_i |\kappa_i|^2 / 2}{|\kappa_i|^2 (\mu_i + \|\mathbf{a}_i\|^2 / \beta)} \right\}. \quad (10)$$

We use the update  $\hat{h}$  as a baseline to define  $\mathcal{H}$ .  $\mathcal{H}$  is the class of all update rules  $h : \mathbb{R}^n \times [n] \rightarrow \mathbb{R}^n$  such that  $\forall \mathbf{x} \in \mathbb{R}^n$  and  $i \in [d]$ ,

$$F(h(\mathbf{x}, i)) \leq F(\hat{h}(\mathbf{x}, i)), \quad (11)$$

or

$$\hat{F}_P(\mathbf{x}, h(\mathbf{x}, i)) \leq \hat{F}_P(\mathbf{x}, \hat{h}(\mathbf{x}, i)), \quad (12)$$

where

$$\hat{F}_P(\mathbf{x}, \mathbf{x}') = \sum_{i=1}^d \left( (\nabla f(A\mathbf{x})^\top \mathbf{a}_i) (x'_i - x_i) + \frac{1}{2\beta} \|\mathbf{a}_i\|^2 (x'_i - x_i)^2 + g_i(x'_i) - g_i(x_i) \right). \quad (13)$$

Intuitively,  $\hat{F}_P(\mathbf{x}, \mathbf{x}')$  approximates the difference of the cost function evaluated at  $\mathbf{x}$  and  $\mathbf{x}'$ , which follows from the smoothness property of  $f$ :

$$\begin{aligned} F(\mathbf{x}') - F(\mathbf{x}) &\leq \nabla f(A\mathbf{x})^\top \left( \sum_{i=1}^d \mathbf{a}_i (x'_i - x_i) \right) + \frac{1}{2\beta} \left\| \sum_{i=1}^d \mathbf{a}_i (x'_i - x_i) \right\|^2 + \sum_{i=1}^d g_i(x'_i) - g_i(x_i) \\ &\leq \sum_{i=1}^d \left( (\nabla f(A\mathbf{x})^\top \mathbf{a}_i) (x'_i - x_i) + \frac{1}{2\beta} \|\mathbf{a}_i\|^2 (x'_i - x_i)^2 + g_i(x'_i) - g_i(x_i) \right), \end{aligned}$$

where the first inequality follows from the smoothness property of  $f$  and the last inequality follows from the triangle inequality.

## B Proofs

### B.1 Omitted Proofs for CD (Sections 2.2, 2.3 and 2.4)

In this section, we present the proofs of the results in Sections 2.2, 2.3 and 2.4.

**Proof of Lemma 1:** We first prove the claim for the update rule  $\hat{h}$  given by (9) in part (i), and next extend it to any update rule in  $\mathcal{H}$  in part (ii).

(i) Our starting point is the inequality

$$F(\mathbf{x}^{t+1}) \leq F(\mathbf{x}^t) - s_i^t G_i(\mathbf{x}^t) - \left( \frac{\mu_i (s_i^t - (s_i^t)^2)}{2} - \frac{(s_i^t)^2 \|\mathbf{a}_i\|^2}{2\beta} \right) |\kappa_i^t|^2, \quad (14)$$

which holds for  $s_i^t \in [0, 1]$ , for all  $i \in [d]$  and which follows from Lemma 3.1 of [15].<sup>5</sup> After minimizing the right-hand side of (14) with respect to  $s_i^t$ , we attain the desired bound (4) for  $s_i^t$  as in (3).

(ii) We now extend (i) to any update rule in  $\mathcal{H}$ . If the update rule  $h(\mathbf{x}^t, i)$  satisfies (11), we can easily recover (4) because

$$F(h(\mathbf{x}^t, i)) \leq F(\hat{h}(\mathbf{x}^t, i)) \leq F(\mathbf{x}^t) - r_i^t.$$

If the update rule satisfies (12), we have

$$F(h(\mathbf{x}^t, i)) \leq F(\mathbf{x}^t) + \hat{F}_P(\mathbf{x}^t, h(\mathbf{x}^t, i)) \quad (15)$$

$$\leq F(\mathbf{x}^t) + \hat{F}_P(\mathbf{x}^t, \hat{h}(\mathbf{x}^t, i)) \quad (16)$$

$$\leq F(\mathbf{x}^t) - r_i^t, \quad (17)$$

where (15) follows from the  $1/\beta$ -smoothness of  $f$  and (13), (16) follows from (12), and (17) follows from the  $\mu_i$ -strong convexity of  $g_i$ . More precisely, by plugging

$$\begin{aligned} g_i(x_i^t + s_i^t \kappa_i^t) &= g_i(x_i^t + s_i^t(u^t - x_i^t)) \leq \\ &= s_i^t g_i(u^t) + (1 - s_i^t) g_i(x_i^t) - \frac{\mu_i}{2} s_i^t (1 - s_i^t) (\kappa_i^t)^2 \end{aligned}$$

into (16), and using the Fenchel-Young property, we recover (14). Then, by setting  $s_i^t$  as in (3) we recover (17).  $\square$

**Lemma 2** *Under the assumptions of Lemma 1, if  $g_i(x_i) = \lambda \cdot (x_i)^2$  in (1) and  $\|\mathbf{a}_i\| = 1$  for all  $i \in [d]$ , then the Gauss-Southwell rule and  $\max\_r$  are equivalent.*

**Proof:** [Proof of Lemma 2] We prove the lemma for  $\mathbf{x} \in \mathbb{R}^n$  and drop the dependence on  $t$  throughout the proof. First, we show that  $G_i \sim (\nabla_i F(\mathbf{x}))^2$ . The function  $g_i(x_i) = \lambda \cdot (x_i)^2$  is  $2\lambda$  strongly convex for all  $i \in [d]$ , i.e.,  $\mu_i = \mu = 2\lambda$ . The dual convex conjugate of the function  $g_i(x_i) = \lambda \cdot (x_i)^2$  is

$$g^*(z) = \frac{z^2}{4\lambda}.$$

Then, for  $\mathbf{w} = \nabla f(A\mathbf{x})$ ,  $G_i(\mathbf{x}) = g_i^*(-\mathbf{a}_i^\top \mathbf{w}) + g_i(x_i) + x_i \mathbf{a}_i^\top \mathbf{w}$  becomes

$$G_i(\mathbf{x}) = \frac{(\mathbf{a}_i^\top \mathbf{w})^2}{4\lambda} + \lambda(x_i)^2 + x_i \mathbf{a}_i^\top \mathbf{w} = \frac{(\mathbf{a}_i^\top \mathbf{w} + 2\lambda x_i)^2}{4\lambda}.$$

As  $\nabla_i F(\mathbf{x}) = \mathbf{a}_i^\top \nabla f(A\mathbf{x}) + 2\lambda x_i = \mathbf{a}_i^\top \mathbf{w} + 2\lambda x_i$ , we have

$$G_i(\mathbf{x}) = \frac{(\nabla_i F(\mathbf{x}))^2}{4\lambda}.$$

Next, note that

$$\kappa_i = \partial g_i^*(-\mathbf{a}_i^\top \mathbf{w}) - x_i = \frac{-\mathbf{a}_i^\top \mathbf{w}}{2\lambda} - x_i = -\frac{\nabla_i F(\mathbf{x})}{2\lambda}.$$

<sup>5</sup>This inequality improves variants in Theorem 2 of [20], Lemma 2 of [24] and Lemma 3 of [6].

Next, plugging  $G_i(\mathbf{x}) = (\nabla_i F(\mathbf{x}))^2/4\lambda$  and  $\kappa_i = -\nabla_i F(\mathbf{x})/2\lambda$  in (3) yields

$$s_i = \min \left\{ 1, \frac{3\lambda}{2\lambda + \frac{1}{\beta}} \right\} \text{ for all } i \in [d].$$

Hence,  $r_i$  in (5) becomes

$$r_i = \begin{cases} \frac{(\nabla_i F(\mathbf{x}))^2}{8\lambda^2\beta} (2\lambda\beta - 1) & \text{if } \lambda \geq \frac{1}{\beta}, \\ \frac{3}{4} \frac{(\nabla_i F(\mathbf{x}))^2}{2\lambda + \frac{1}{\beta}} & \text{otherwise,} \end{cases}$$

Hence,  $\arg \max_{i \in [d]} r_i = \arg \max_{i \in [d]} (\nabla_i F(\mathbf{x}))^2$ . In Gauss-Southwell rule, we choose the coordinate whose gradient has the largest magnitude, i.e.,  $\arg \max_{i \in [d]} |\nabla_i F(\mathbf{x})|$ . As a result, the selection rules  $\max\_r$  and Gauss-Southwell rule are equivalent.  $\square$

Now, we show that our approach leads to a linear convergence when  $g_i$  is strongly convex for  $i \in [d]$ , i.e., when  $\mu_i > 0$ .

**Proof:** [Proof of Theorem 1] According to Proposition 1, we know that the selection rule  $\max\_r$  is optimal for the bound (4). Therefore, if we prove the convergence results using (4) for another selection rule, then the same convergence result holds for  $\max\_r$ . For this proof, we use the following selection rule: At time  $l$ , we choose the coordinate  $i$  with the largest  $G_i(\mathbf{x}^l)^{\mu_i/(\mu_i + \|\mathbf{a}_i\|^2/\beta)}$ , which we denote by  $i^*$ .

First, we show that  $r_{i^*}^t$  in (5) is lower bounded as follows

$$r_{i^*}^t \geq G_{i^*}(\mathbf{x}^t) \frac{\mu_{i^*}}{\mu_{i^*} + \frac{\|\mathbf{a}_{i^*}\|^2}{\beta}}. \quad (18)$$

We prove (18) for two cases  $s_{i^*}^t = 1$  and  $s_{i^*}^t < 1$  separately, where  $s_i^t$  is defined in (3) for  $i \in [d]$ .

(a) If  $s_{i^*}^t = 1$ , according to (5) we have

$$r_{i^*}^t = G_{i^*}(\mathbf{x}^t) - \frac{\|\mathbf{a}_{i^*}\|^2 |\kappa_{i^*}^t|^2}{2\beta}.$$

Next, we prove (18) by showing that  $r_{i^*}^t - G_{i^*}(\mathbf{x}^t) \frac{\mu_{i^*}}{\mu_{i^*} + \frac{\|\mathbf{a}_{i^*}\|^2}{\beta}} \geq 0$ ,

$$\begin{aligned} & r_{i^*}^t - G_{i^*}(\mathbf{x}^t) \frac{\mu_{i^*}}{\mu_{i^*} + \frac{\|\mathbf{a}_{i^*}\|^2}{\beta}} \\ &= G_{i^*}(\mathbf{x}^t) \frac{\frac{\|\mathbf{a}_{i^*}\|^2}{\beta}}{\mu_{i^*} + \frac{\|\mathbf{a}_{i^*}\|^2}{\beta}} - \frac{\|\mathbf{a}_{i^*}\|^2 |\kappa_{i^*}^t|^2}{2\beta} \\ &= \frac{\|\mathbf{a}_{i^*}\|^2}{2\beta} \cdot \frac{2G_{i^*}(\mathbf{x}^t) - \mu_{i^*} |\kappa_{i^*}^t|^2 - \frac{\|\mathbf{a}_{i^*}\|^2 |\kappa_{i^*}^t|^2}{\beta}}{\mu_{i^*} + \frac{\|\mathbf{a}_{i^*}\|^2}{\beta}} \geq 0, \end{aligned}$$

where the last inequality follows by setting  $s_{i^*}^t = 1$  in (3) which then reads:

$$G_{i^*}(\mathbf{x}^t) - \frac{\mu_{i^*} |\kappa_{i^*}^t|^2}{2} - \frac{\|\mathbf{a}_{i^*}\|^2 |\kappa_{i^*}^t|^2}{\beta} \geq 0.$$

This proves (18).

(b) Now, if  $s_{i^*}^t < 1$ , according to (5) we have

$$r_{i^*}^t = \frac{(G_{i^*}(\mathbf{x}^t) + \mu_{i^*} |\kappa_{i^*}^t|^2/2)^2}{2(\mu_{i^*} + \frac{\|\mathbf{a}_{i^*}\|^2}{\beta}) |\kappa_{i^*}^t|^2}. \quad (19)$$

With  $r_{i^*}^t$  given by (19), (18) becomes

$$\frac{(G_{i^*}(\mathbf{x}^t) + \mu_{i^*}|\kappa_{i^*}^t|^2/2)^2}{2(\mu_{i^*} + \frac{\|\mathbf{a}_{i^*}\|^2}{\beta})|\kappa_{i^*}^t|^2} \geq G_{i^*}(\mathbf{x}^t) \frac{\mu_{i^*}}{\mu_{i^*} + \frac{\|\mathbf{a}_{i^*}\|^2}{\beta}},$$

and rearranging the items, it successively becomes

$$\begin{aligned} \frac{(G_{i^*}(\mathbf{x}^t) + \mu_{i^*}|\kappa_{i^*}^t|^2/2)^2}{2|\kappa_{i^*}^t|^2} &\geq G_{i^*}(\mathbf{x}^t)\mu_{i^*} \\ (G_{i^*}(\mathbf{x}^t) + \mu_{i^*}|\kappa_{i^*}^t|^2/2)^2 &\geq 2G_{i^*}(\mathbf{x}^t)|\kappa_{i^*}^t|^2\mu_{i^*} \\ G_{i^*}(\mathbf{x}^t)^2 + (\mu_{i^*}|\kappa_{i^*}^t|^2/2)^2 - G_{i^*}(\mathbf{x}^t)|\kappa_{i^*}^t|^2\mu_{i^*} &\geq 0 \\ (G_{i^*}(\mathbf{x}^t) - \mu_{i^*}|\kappa_{i^*}^t|^2/2)^2 &\geq 0, \end{aligned}$$

which always holds and therefore recovers the claim, i.e., (18).

Hence in both cases (18) holds. Now, plugging (18) and  $G(\mathbf{x}^t) \geq \epsilon(\mathbf{x}^t)$  in (4) yields

$$\begin{aligned} \epsilon(\mathbf{x}^{t+1}) - \epsilon(\mathbf{x}^t) &= F(\mathbf{x}^{t+1}) - F(\mathbf{x}^t) \leq -r_{i^*}^t \\ &\leq -G(\mathbf{x}^t) \max_{i \in [d]} \frac{G_i(\mathbf{x}^t)\mu_i}{G(\mathbf{x}^t)(\mu_i + \frac{\|\mathbf{a}_i\|^2}{\beta})} \leq -\epsilon(\mathbf{x}^t) \max_{i \in [d]} \frac{G_i(\mathbf{x}^t)\mu_i}{G(\mathbf{x}^t)(\mu_i + \frac{\|\mathbf{a}_i\|^2}{\beta})}, \end{aligned} \quad (20)$$

that results in

$$\epsilon(\mathbf{x}^{t+1}) \leq \epsilon(\mathbf{x}^t) - \epsilon(\mathbf{x}^t) \max_{i \in [d]} \frac{G_i(\mathbf{x}^t)\mu_i}{G(\mathbf{x}^t)(\mu_i + \frac{\|\mathbf{a}_i\|^2}{\beta})}, \quad (21)$$

which gives

$$\epsilon(\mathbf{x}^{t+1}) \leq \epsilon(\mathbf{x}^t) \left( 1 - \max_{i \in [d]} \frac{G_i(\mathbf{x}^t)\mu_i}{G(\mathbf{x}^t)(\mu_i + \frac{\|\mathbf{a}_i\|^2}{\beta})} \right), \quad (22)$$

As (22) holds for all  $t$ , we conclude the proof.  $\square$

**Proof: [Proof of Theorem 2]** Similar to the proof of Theorem 1, we prove the theorem for the following selection rule: At time  $t$ , the coordinate  $i$  with the largest  $G_i(\mathbf{x}^t)$  is chosen. Since the optimal selection rule for minimizing the bound in Lemma 1 is to select the coordinate  $i$  with the largest  $r_i^t$  in (4), as shown by Proposition 1, the convergence guarantees provided here holds for  $\max_r$  as well.

The bound (7) is proven by using induction.

Suppose that (7) holds for some  $t \geq t_0$ . We want to verify it for  $t + 1$ . Let  $i^* = \operatorname{argmax}_{i \in [d]} G_i(\mathbf{x}^t)$ . We study two cases  $s_{i^*}^t = 1$  and  $s_{i^*}^t < 1$  separately, where  $s_i^t$  is defined in (3) for  $i \in [d]$ .

(a) If  $s_{i^*}^t = 1$ , then first we show that

$$\epsilon(\mathbf{x}^{t+1}) \leq \epsilon(\mathbf{x}^t) \cdot \left( 1 - \frac{1}{2d} \right), \quad (23)$$

second we show that induction hypothesis (7) holds. Since  $s_{i^*}^t = 1$ , (3) yields that

$$G_{i^*}(\mathbf{x}^t) \geq \frac{|\kappa_{i^*}^t|^2 \|\mathbf{a}_{i^*}\|^2}{\beta} + \frac{\mu_{i^*} |\kappa_{i^*}^t|}{2},$$

that gives

$$G_{i^*}(\mathbf{x}^t) \geq \frac{|\kappa_{i^*}^t|^2 \|\mathbf{a}_{i^*}\|^2}{\beta},$$

which, combined with (5), implies that

$$r_{i^*}^t = G_{i^*}(\mathbf{x}^t) - \frac{|\kappa_{i^*}^t|^2 \|\mathbf{a}_{i^*}\|^2}{2\beta} \geq \frac{G_{i^*}(\mathbf{x}^t)}{2}. \quad (24)$$

Using  $F(\mathbf{x}^{t+1}) - F(\mathbf{x}^t) = \epsilon(\mathbf{x}^{t+1}) - \epsilon(\mathbf{x}^t)$  and (24), we can rewrite (4) as

$$\epsilon(\mathbf{x}^{t+1}) - \epsilon(\mathbf{x}^t) \leq -\frac{G_{i^*}(\mathbf{x}^t)}{2}.$$

As  $i^*$  is the coordinate with the largest  $G_i(\mathbf{x}^t)$ , we have

$$\epsilon(\mathbf{x}^{t+1}) - \epsilon(\mathbf{x}^t) \leq -\frac{G_{i^*}(\mathbf{x}^t)}{2} \leq -\frac{G(\mathbf{x}^t)}{2d}. \quad (25)$$

According to weak duality,  $\epsilon(\mathbf{x}^t) \leq G(\mathbf{x}^t)$ . Plugging this in (25) yields

$$\epsilon(\mathbf{x}^{t+1}) - \epsilon(\mathbf{x}^t) \leq -\frac{G(\mathbf{x}^t)}{2d} \leq -\frac{\epsilon(\mathbf{x}^t)}{2d}, \quad (26)$$

and therefore

$$\epsilon(\mathbf{x}^{t+1}) \leq \epsilon(\mathbf{x}^t) \cdot \left(1 - \frac{1}{2d}\right). \quad (27)$$

Now, by plugging (7) in (27) we prove the inductive step at time  $l + 1$ :

$$\begin{aligned} \epsilon(\mathbf{x}^{t+1}) &\leq \frac{\frac{8L^2\eta^2}{\beta}}{2d+t-t_0} \left(1 - \frac{1}{2d}\right) \\ &\leq \frac{\frac{8L^2\eta^2}{\beta}}{2d+t+1-t_0}. \end{aligned}$$

(b) If  $s_{i^*}^t < 1$ , the marginal decreases in (5) becomes

$$r_{i^*}^t = \frac{\left(G_{i^*}(\mathbf{x}^t) + \mu_{i^*} \frac{|\kappa_{i^*}^t|^2}{2}\right)^2}{2|\kappa_{i^*}^t|^2 \left(\mu_{i^*} + \frac{\|\mathbf{a}_{i^*}\|^2}{\beta}\right)}. \quad (28)$$

Next, we show that

$$r_{i^*}^t \geq \frac{G_{i^*}^2(\mathbf{x}^t)\beta}{2|\kappa_{i^*}^t|^2 \|\mathbf{a}_{i^*}\|^2}. \quad (29)$$

To prove (29), we plug (28) in (29) and rearrange the terms which gives

$$\frac{\|\mathbf{a}_{i^*}\|^2}{\beta} \left( \mu_{i^*}^2 \frac{|\kappa_{i^*}^t|^4}{4} + G_{i^*}(\mathbf{x}^t) \mu_{i^*} |\kappa_{i^*}^t|^2 \right) \geq \mu_{i^*} G_{i^*}^2(\mathbf{x}^t), \quad (30)$$

(30) holds because of (3). More precisely, if we plug the value of  $s_{i^*}^t < 1$  in (3) we get

$$G_{i^*}(\mathbf{x}^t) \leq \frac{|\kappa_{i^*}^t|^2 \|\mathbf{a}_{i^*}\|^2}{\beta} + \frac{\mu_{i^*} |\kappa_{i^*}^t|}{2}, \quad (31)$$

which shows the correctness of (30), hence (29).

According to Lemma 22 of [20] or Lemma 2.7 of [15] we know  $|\kappa_i^t| \leq 2L$ . Plugging  $|\kappa_i^t| \leq 2L$  in (29) yields

$$r_{i^*}^t \geq \frac{G_{i^*}^2(\mathbf{x}^t)\beta}{8L^2 \|\mathbf{a}_{i^*}\|^2}.$$



Next, using weak duality and the definition of  $\eta$  in Theorem 2, we lower bound  $r_{i^*}^t$  by

$$\begin{aligned} r_{i^*}^t &\geq \left( \frac{G_{i^*}(\mathbf{x}^t)}{G(\mathbf{x}^t) \|\mathbf{a}_{i^*}\|} \right)^2 \frac{G^2(\mathbf{x}^t)\beta}{8L^2} \\ &\geq \frac{\epsilon^2(\mathbf{x}^t)\beta}{8L^2\eta^2}. \end{aligned} \quad (32)$$

Hence we have

$$\epsilon(\mathbf{x}^{t+1}) - \epsilon(\mathbf{x}^t) \leq -r_{i^*}^t \leq -\frac{\epsilon^2(\mathbf{x}^t)\beta}{8L^2\eta^2},$$

and therefore

$$\epsilon(\mathbf{x}^{t+1}) \leq \epsilon(\mathbf{x}^t) \left( 1 - \frac{\epsilon(\mathbf{x}^t)\beta}{8L^2\eta^2} \right). \quad (33)$$

Let  $f(y) = y(1 - y\beta/8L^2\eta^2)$ , as  $f'(y) > 0$  for  $y < 4L^2\eta^2/\beta$ , plugging (7) in (33) yields

$$\epsilon(\mathbf{x}^t) \left( 1 - \frac{\epsilon(\mathbf{x}^t)\beta}{8L^2\eta^2} \right) \leq \frac{\frac{8L^2\eta^2}{\beta}}{2d+t-t_0} \left( 1 - \frac{\frac{8L^2\eta^2}{\beta}}{2d+t-t_0} \frac{\beta}{8L^2\eta^2} \right). \quad (34)$$

Now, we prove the inductive step at time  $t+1$  by using (34):

$$\begin{aligned} \epsilon(\mathbf{x}^{t+1}) &\leq \frac{\frac{8L^2\eta^2}{\beta}}{2d+t-t_0} \cdot \left( 1 - \frac{\frac{8L^2\eta^2}{\beta}}{2d+t-t_0} \frac{\beta}{8L^2\eta^2} \right) \\ &\leq \frac{\frac{8L^2\eta^2}{\beta}}{2d+t+1-t_0}. \end{aligned}$$

To conclude the proof, we need to show that the induction base case is correct, i.e., we need to show that

$$\epsilon(\mathbf{x}^{t_0}) \leq \frac{4L^2\eta^2}{\beta d}. \quad (35)$$

First, we rewrite (5) using  $r_{i^*}^t \geq \epsilon^2(\mathbf{x}^t)\beta/8L^2\eta^2$  for  $s_{i^*}^t < 1$  and  $r_{i^*}^t \geq \epsilon(\mathbf{x}^t)/2d$  for  $s_{i^*}^t = 1$  as

$$\epsilon(\mathbf{x}^{t+1}) - \epsilon(\mathbf{x}^t) \leq -r_{i^*}^t \leq -1\{s_{i^*}^t = 1\} \frac{\epsilon(\mathbf{x}^t)}{2d} - 1\{s_{i^*}^t < 1\} \frac{\epsilon^2(\mathbf{x}^t)\beta}{8L^2\eta^2}. \quad (36)$$

From (36), for  $l < t_0$  we have

$$\begin{aligned} \epsilon(\mathbf{x}^{t+1}) &\leq \epsilon(\mathbf{x}^t) \left( 1 - 1\{s_{i^*}^t = 1\} \frac{1}{2d} - 1\{s_{i^*}^t < 1\} \frac{\epsilon(\mathbf{x}^t)\beta}{8L^2\eta^2} \right) \\ &\leq \epsilon(\mathbf{x}^t) \left( 1 - \min \left\{ \frac{1}{2d}, \frac{\epsilon(\mathbf{x}^t)\beta}{8L^2\eta^2} \right\} \right) \\ &\leq \epsilon(\mathbf{x}^t) \left( 1 - \min \left\{ \frac{1}{2d}, \frac{\epsilon(\mathbf{x}^{t_0})\beta}{8L^2\eta^2} \right\} \right), \end{aligned} \quad (37)$$

where (37) holds because for  $t \leq t_0$  we know that  $\epsilon(\mathbf{x}^{t_0}) \leq \epsilon(\mathbf{x}^t)$ . We use the proof by contradiction to check the induction base, i.e., we show that assuming  $\epsilon(\mathbf{x}^{t_0}) > 4L^2\eta^2/\beta d$  results in a contradiction. If  $\epsilon(\mathbf{x}^{t_0}) > 4L^2\eta^2/\beta d$ , then

$$\frac{1}{2d} = \min \left\{ \frac{1}{2d}, \frac{\epsilon(\mathbf{x}^{t_0})\beta}{8L^2\eta^2} \right\}. \quad (38)$$

From (37) and (38) we get

$$\epsilon(\mathbf{x}^{t_0}) \leq \epsilon(\mathbf{x}^0) \left( 1 - \frac{1}{2d} \right)^{t_0}. \quad (39)$$

Using the inequality  $1 + y < \exp(y)$  for  $y < 1$  we have

$$\begin{aligned}\epsilon(\mathbf{x}^{t_0}) &\leq \epsilon(\mathbf{x}^0) \exp\left(-\frac{t_0}{2d}\right) = \epsilon(\mathbf{x}^0) \exp\left(-\log \frac{d\beta\epsilon(\mathbf{x}^0)}{4L^2\eta^2}\right) \\ &= \epsilon(\mathbf{x}^0) \frac{4L^2\eta^2}{\beta d\epsilon(\mathbf{x}^0)} = \frac{4L^2\eta^2}{\beta d},\end{aligned}$$

which shows that the induction base holds and this concludes the proof.  $\square$

**Proof:** [Proof of Proposition 2] The proof is similar to the proof of Theorem 2 and it uses induction. We highlight the differences here. To make the proof easier, we simplify the definition of  $s_i^t$  in (3) and the marginal decrease  $r_i^t$  in (5) by using the upper bound  $|\kappa_i^t| \leq 2L$  (recall that  $L = L_i$  for all  $i$  in Proposition 2). The upper bound  $|\kappa_i^t| \leq 2L$  follows from Lemma 22 of [20]. The starting point of the proof is the following equation

$$F(\mathbf{x}^{t+1}) \leq F(\mathbf{x}^t) - s_i^t G_i(\mathbf{x}^t) + 2 \frac{(s_i^t)^2 \|\mathbf{a}_1\|^2}{\beta} L^2, \quad (40)$$

which is derived by upper bounding (14) using  $|\kappa_i^t| \leq 2L$  and  $\mu_i = 0$  for all  $i \in [d]$ , which holds since  $g_i(\cdot)$  are not strongly convex. Equation (40) holds for  $s_i^t \in [0, 1]$ , and for all  $i \in [d]$ . After minimizing the right-hand side of (40) with respect to  $s_i^t$ , we attain the following *new*  $s_i^t$  and the *new* marginal decrease  $r_i^t$ :

$$s_i^t = \min \left\{ 1, \frac{G_i^t}{4L^2 \|\mathbf{a}_1\|^2 / \beta} \right\}, \quad (41)$$

and

$$r_i^t = \begin{cases} G_i^t - \frac{2\|\mathbf{a}_1\|^2 L^2}{\beta} & \text{if } s_i^t = 1, \\ \frac{(G_i^t)^2}{8L^2 \|\mathbf{a}_1\|^2 / \beta} & \text{otherwise.} \end{cases} \quad (42)$$

Hereafter, let

$$\alpha = \frac{8L^2 \|\mathbf{a}_1\|^2}{\beta (\varepsilon/d^2 + (1-\varepsilon)\eta^2/c)}$$

as defined in Proposition 2.

Now, suppose that (7) holds for some  $t \geq t_0$ . We want to verify it for  $t + 1$ . We start the analysis by computing the expected marginal decrease for  $\varepsilon$  in Algorithm 1,

$$\mathbb{E} [r_i^t | \mathbf{x}^t] \geq \frac{\varepsilon}{d} \left( \sum_{s_i^t=1} r_i^t + \sum_{s_i^t < 1} r_i^t \right) + (1 - \varepsilon) \frac{r_{i^*}^t}{c}, \quad (43)$$

where  $c$  is a finite constant in Proposition 2 and  $i^* = \arg \max_{i \in [d]} r_i^t$ . The expectation is with respect to the random choice of the algorithm.

When  $s_i^t = 1$ , from (41) we have  $G_i^t \geq 4L^2 \|\mathbf{a}_1\|^2 / \beta$  and from (42) we have  $r_i^t \geq 2L^2 \|\mathbf{a}_1\|^2 / \beta$ . Plugging  $r_i^t \geq 2L^2 \|\mathbf{a}_1\|^2 / \beta$  when  $s_i^t = 1$  in (43) yields

$$\mathbb{E} [r_i^t | \mathbf{x}^t] \geq \frac{\varepsilon}{d} \left( \sum_{s_i^t=1} \frac{2L^2 \|\mathbf{a}_1\|^2}{\beta} + \sum_{s_i^t < 1} \frac{G_i^2(\mathbf{x}^t) \beta}{8L^2 \|\mathbf{a}_1\|^2} \right) + (1 - \varepsilon) \frac{r_{i^*}^t}{c}, \quad (44)$$

(a) If  $s_{i^*}^t = 1$ , then the cost function decreases at least by

$$\mathbb{E} [r_i^t | \mathbf{x}^t, s_{i^*}(\mathbf{x}^t) = 1] \geq \frac{2L^2 \|\mathbf{a}_1\|^2}{\beta} \left( \frac{\varepsilon}{d} + \frac{1 - \varepsilon}{c} \right). \quad (45)$$

(b) Let  $s_{i^*}^t < 1$ , from the definition of  $s_{i^*}^t$  we know that  $G_i(\mathbf{x}^t) \leq G_{i^*}(\mathbf{x}^t)$  for all  $i \in [d]$ , hence we deduce that  $s_i^t < 1$  for all  $i \in [d]$ , then (44) reads as

$$\begin{aligned} \mathbb{E}[r_i^t | \mathbf{x}^t, s_{i^*}(\mathbf{x}^t) < 1] &\geq \frac{\varepsilon}{d} \left( \sum_{i=1}^d \frac{G_i^2(\mathbf{x}^t)\beta}{8L^2\|\mathbf{a}_1\|^2} \right) + (1-\varepsilon) \frac{G_{i^*}^2(\mathbf{x}^t)\beta}{8L^2c\|\mathbf{a}_1\|^2} \\ &\geq \frac{\beta}{8L^2\|\mathbf{a}_1\|^2} \left( \varepsilon \frac{\left( \sum_{i=1}^d G_i(\mathbf{x}^t) \right)^2}{d^2} + (1-\varepsilon) \frac{G_{i^*}^2(\mathbf{x}^t)}{c} \right) \\ &\geq \frac{\beta}{8L^2\|\mathbf{a}_1\|^2} \left( \varepsilon \frac{G^2(\mathbf{x}^t)}{d^2} + (1-\varepsilon) \frac{G^2(\mathbf{x}^t)}{\eta^2 c} \right), \end{aligned} \quad (46)$$

where (46) follows from the assumption  $G(\mathbf{x}^t) \leq \eta G_{i^*}(\mathbf{x}^t)$  in Proposition 2. Similar to the proof of Theorem 2, we plug the inequality  $\epsilon(\mathbf{x}^t) < G(\mathbf{x}^t)$  in (46) and get

$$\mathbb{E}[r_i^t | \mathbf{x}^t, s_{i^*}(\mathbf{x}^t) < 1] \geq \frac{\beta \epsilon^2(\mathbf{x}^t)}{8L^2\|\mathbf{a}_1\|^2} \left( \frac{\varepsilon}{d^2} + \frac{(1-\varepsilon)}{\eta^2 c} \right) = \frac{\epsilon^2(\mathbf{x}^t)}{\alpha}. \quad (47)$$

Next, we use (45), (47) and use the tower property to check the induction hypothesis

$$\begin{aligned} \mathbb{E}[\epsilon(\mathbf{x}^{t+1})] - \mathbb{E}[\epsilon(\mathbf{x}^t)] &\leq \mathbb{E}[\mathbf{1}\{s_{i^*}^t = 1\} \mathbb{E}[r_i^t | \mathbf{x}^t, s_{i^*}^t = 1]] + \mathbb{E}[\mathbf{1}\{s_{i^*}^t < 1\} \mathbb{E}[r_i^t | \mathbf{x}^t, s_{i^*}^t < 1]] \\ &\leq -\mathbb{E} \left[ \mathbf{1}\{s_{i^*}^t = 1\} \frac{2L^2\|\mathbf{a}_1\|^2}{\beta} \left( \frac{\varepsilon}{d} + \frac{1-\varepsilon}{c} \right) + \mathbf{1}\{s_{i^*}^t < 1\} \frac{\epsilon^2(\mathbf{x}^t)}{\alpha} \right]. \end{aligned} \quad (48)$$

As we assumed

$$\epsilon^2(\mathbf{x}^t) \leq \epsilon^2(\mathbf{x}^0) \leq \frac{2\alpha L^2\|\mathbf{a}_1\|^2}{\beta} \left( \frac{\varepsilon}{d} + \frac{1-\varepsilon}{c} \right)$$

in Proposition 2, we have

$$\min \left\{ \frac{2L^2\|\mathbf{a}_1\|^2}{\beta} \left( \frac{\varepsilon}{d} + \frac{1-\varepsilon}{c} \right), \frac{\epsilon^2(\mathbf{x}^t)}{\alpha} \right\} = \frac{\epsilon^2(\mathbf{x}^t)}{\alpha}.$$

Hence, (48) becomes

$$\mathbb{E}[\epsilon(\mathbf{x}^{t+1})] - \mathbb{E}[\epsilon(\mathbf{x}^t)] \leq -\mathbb{E} \left[ \frac{\epsilon^2(\mathbf{x}^t)}{\alpha} \right] \leq -\frac{\mathbb{E}[\epsilon(\mathbf{x}^t)]^2}{\alpha}, \quad (49)$$

where the last inequality is because of the Jensen's inequality (i.e.,  $\mathbb{E}[\epsilon(\mathbf{x}^t)]^2 \leq \mathbb{E}[\epsilon^2(\mathbf{x}^t)]$ ). By rearranging the terms in (49) we get

$$\mathbb{E}[\epsilon(\mathbf{x}^{t+1})] \leq \mathbb{E}[\epsilon(\mathbf{x}^t)] \left( 1 - \frac{\mathbb{E}[\epsilon(\mathbf{x}^t)]}{\alpha} \right) \quad (50)$$

Now, let  $f(y) = y(1 - \frac{y}{\alpha})$ , as  $f'(y) > 0$  for  $y < \alpha/2$ , we can plug (8) in (50) and prove the inductive step at time  $t+1$ ;

$$\begin{aligned} \mathbb{E}[\epsilon(\mathbf{x}^{t+1})] &\leq \mathbb{E}[\epsilon(\mathbf{x}^t)] \left( 1 - \frac{\mathbb{E}[\epsilon(\mathbf{x}^t)]}{\alpha} \right) \\ &\leq \frac{\alpha}{2+t-t_0} \cdot \left( 1 - \frac{1}{2+t-t_0} \right) \leq \frac{\alpha}{2+t+1-t_0}. \end{aligned} \quad (51)$$

Finally, we need to show that the induction basis indeed is correct. By using the inequality (49) for  $t = 1, \dots, t_0$  we get

$$\mathbb{E}[\epsilon(\mathbf{x}^{t_0})] \leq \epsilon(\mathbf{x}^0) - \sum_{t=0}^{t_0-1} \frac{\mathbb{E}[\epsilon(\mathbf{x}^t)]^2}{\alpha}, \quad (52)$$

Table 2: Statistics of the datasets. The first three datasets are used for regression and the last two for binary classification.

|         | #classes | #datapoints | #features | %nonzero |
|---------|----------|-------------|-----------|----------|
| usps    | 10       | 7291        | 256       | 100%     |
| aloi    | 1000     | 108000      | 128       | 24%      |
| protein | 3        | 17766       | 357       | 29%      |
| w8a     | 2        | 49749       | 300       | 4%       |
| a9a     | 2        | 32561       | 123       | 11%      |

since at each iteration the cost function decreases, we have  $\epsilon(\mathbf{x}^{t+1}) \leq \epsilon(\mathbf{x}^t)$  for all  $t \geq 0$ . Therefore, if  $\mathbb{E}[\epsilon(\mathbf{x}^t)] \leq \alpha/2$  for any  $0 \leq t \leq t_0$ , we can conclude that  $\mathbb{E}[\epsilon(\mathbf{x}^{t_0})] \leq \alpha/2$ . We prove the induction hypothesis by showing that  $\mathbb{E}[\epsilon(\mathbf{x}^{t_0})] > \alpha/2$  results in a contradiction. With this assumption, (52) becomes

$$\mathbb{E}[\epsilon(\mathbf{x}^{t_0})] \leq \epsilon(\mathbf{x}^0) - t_0 \frac{\alpha}{4} = \epsilon(\mathbf{x}^0) \left( 1 - t_0 \frac{\alpha}{4\epsilon(\mathbf{x}^0)} \right), \quad (53)$$

Next, we use the inequality  $1 + y \leq \exp(y)$  with (53)

$$\mathbb{E}[\epsilon(\mathbf{x}^{t_0})] \leq \epsilon(\mathbf{x}^0) \exp \left( -t_0 \frac{\alpha}{4\epsilon(\mathbf{x}^0)} \right). \quad (54)$$

Plugging

$$t_0 = \frac{4\epsilon(\mathbf{x}^0)}{\alpha} \log \left( \frac{2\epsilon(\mathbf{x}^0)}{\alpha} \right)$$

in (54) yields

$$\mathbb{E}[\epsilon(\mathbf{x}^{t_0})] \leq \frac{\alpha}{2}, \quad (55)$$

which proves the induction basis and concludes the proof.

□
